# Supplementary material
Source: Elsevier journal article supplement (https://www.sciencedirect.com/science/article/pii/S2173574323000096)
Supplement: mmc1 [file S2173574323000096:mmc1.pdf]

## Clinical Rheumatology

# Disease burden and costs for patients with hip and knee osteoarthritis and chronic moderate-to-severe refractory pain on treatment with strong opioids in Spain

## SUPPLEMENTARY MATERIAL

Table S1. Unit costs and work disability (2018).

| Health and non-health resources    | Unit costs (€) |
|------------------------------------|----------------|
| Medical visits                     |                |
| Primary care medical visit         | 23.2           |
| Emergency medical visit            | 117.5          |
| Hospitalization (one day)          | 480.9          |
| Specialized care medical visit     | 92.5           |
| Rehabilitation session             | 156.0          |
| Visit to the pain clinic           | 185.0          |
| Complementary tests                |                |
| Laboratory tests                   | 22.3           |
| Conventional radiology             | 18.5           |
| Other diagnostic/therapeutic tests | 37.1           |
| Computed tomography                | 96.0           |
| Magnetic nuclear resonance         | 177.0          |
| Pharmaceutical prescription        | Retail price   |
| Work disability - Indirect costs   |                |
| Cost per day not worked            | 101.2          |

Sources: hospital accountability and INE[30].

INE: Instituto Nacional de Estadística.

Table S2. Health resource use in the total sample and according to type of opioid.

| Study groups                                   | Fentanyl               | Tapentadol               | Oxycodone <sup>a</sup>   | Bupren.     | p      | Total                    |
|------------------------------------------------|------------------------|--------------------------|--------------------------|-------------|--------|--------------------------|
| Number of patients, %                          | 979                    | 625                      | 572                      | 425         |        | 2832                     |
| <b>12 months pre-opioid</b>                    |                        |                          |                          |             |        |                          |
| Primary care visits                            | 10.5 (15.9)            | 21.2 (20.5)              | 19.2 (20.3)              | 18.1 (19.2) | <0.001 | 19.7 (20.6)              |
| Lab tests                                      | 0.6 (0.9)              | 1.0 (1.3)                | 1.1 (1.5)                | 1.0 (1.4)   | 0.047  | 1.1 (1.4)                |
| Conventional radiology                         | 0.8 (1.3)              | 1.5 (1.6)                | 1.5 (1.6)                | 1.3 (1.4)   | 0.001  | 1.4 (1.6)                |
| Axial tomography                               | 0.2 (0.8)              | 0.5 (1.2)                | 0.4 (1.2)                | 0.3 (1.0)   | 0.031  | 0.4 (1.1)                |
| MNRI                                           | 0.1 (0.2)              | 0.2 (0.4)                | 0.1 (0.3)                | 0.1 (0.3)   | 0.001  | 0.1 (0.3)                |
| Rehabilitation sessions                        | 0.0 (0.0)              | 0.2 (1.4)                | 0.1 (0.9)                | 0.1 (0.7)   | <0.001 | 0.1 (0.9)                |
| Pain clinic session                            | 0.4 (1.1)              | 1.0 (1.5)                | 0.9 (1.5)                | 0.8 (1.4)   | 0.004  | 0.9 (1.4)                |
| Other complementary tests                      | 0.3 (0.7)              | 0.8 (1.0)                | 0.7 (1.0)                | 0.6 (1.0)   | <0.001 | 0.7 (1.0)                |
| Specialist visits                              | 0.9 (3.7)              | 2.5 (5.2)                | 2.1 (5.0)                | 1.5 (4.7)   | 0.004  | 2.0 (5.2)                |
| Hospital emergency visits                      | 0.4 (0.8)              | 1.3 (1.2)                | 1.2 (1.7)                | 1.4 (3.4)   | 0.078  | 1.2 (2.7)                |
| Hospital stays (days)                          | 1.1 (3.1)              | 2.0 (4.0)                | 1.8 (4.1)                | 1.3 (3.4)   | 0.009  | 1.6 (3.8)                |
| <b>12 months post-strong opioid initiation</b> |                        |                          |                          |             |        |                          |
| Primary care visits                            | 12.2 (16.4)            | 17.9 (19.6) <sup>‡</sup> | 17.9 (19.7) <sup>†</sup> | 14.7 (17.4) | 0.003  | 17.4 (19.6) <sup>‡</sup> |
| Lab tests                                      | 0.6 (0.9)              | 0.9 (1.3)                | 0.9 (1.3) <sup>‡</sup>   | 1.0 (1.5)   | 0.146  | 1.0 (1.4) <sup>‡</sup>   |
| Conventional radiology                         | 0.9 (1.4)              | 1.6 (1.6) <sup>‡</sup>   | 1.5 (1.6) <sup>‡</sup>   | 1.3 (1.5)   | 0.001  | 1.5 (1.6) <sup>‡</sup>   |
| Axial tomography                               | 0.2 (0.8)              | 0.6 (1.2) <sup>‡</sup>   | 0.5 (1.1) <sup>*</sup>   | 0.3 (0.8)   | <0.001 | 0.4 (1.1) <sup>‡</sup>   |
| MNRI                                           | 0.1 (0.6)              | 0.4 (0.8) <sup>‡</sup>   | 0.3 (0.7) <sup>‡</sup>   | 0.2 (0.6)   | <0.001 | 0.3 (0.8) <sup>‡</sup>   |
| Rehabilitation sessions                        | 0.0 (0.0)              | 0.3 (1.4)                | 0.2 (1.3)                | 0.2 (1.6)   | 0.001  | 0.1 (1.1)                |
| Pain clinic sessions                           | 0.6 (1.2)              | 1.1 (1.4)                | 1.1 (1.6) <sup>‡</sup>   | 0.9 (1.5)   | 0.013  | 1.0 (1.5) <sup>‡</sup>   |
| Other complementary tests                      | 0.4 (0.9) <sup>*</sup> | 0.8 (1.1) <sup>‡</sup>   | 0.8 (1.1) <sup>†</sup>   | 0.6 (0.9)   | 0.015  | 0.7 (1.1) <sup>‡</sup>   |
| Specialist visits                              | 2.1 (4.3) <sup>‡</sup> | 3.9 (7.3) <sup>‡</sup>   | 3.2 (7) <sup>‡</sup>     | 2.0 (5.2)   | <0.001 | 2.9 (7) <sup>‡</sup>     |
| Hospital emergency visits                      | 1.9 (2.3) <sup>‡</sup> | 1.6 (1.7) <sup>‡</sup>   | 1.7 (3.7) <sup>‡</sup>   | 1.5 (2.5)   | 0.259  | 1.6 (3) <sup>‡</sup>     |
| Hospital stays (days)                          | 1.3 (2.4)              | 2.5 (7.2) <sup>†</sup>   | 2.3 (6.9)                | 1.1 (4.9)   | <0.001 | 1.9 (6.3) <sup>†</sup>   |
| <b>36 months follow up</b>                     |                        |                          |                          |             |        |                          |
| Primary care visits                            | 29.5 (9.9)             | 32.9 (10.3)              | 33.2 (10.1)              | 32.8 (10.3) | 0.070  | 32.8 (10.3)              |
| Lab tests                                      | 1.9 (2.2)              | 2.6 (2.9)                | 2.7 (2.8)                | 2.8 (3.2)   | 0.210  | 2.6 (3.1)                |
| Conventional radiology                         | 1.3 (1.4)              | 1.8 (2)                  | 1.5 (1.8)                | 1.8 (1.9)   | 0.003  | 1.6 (1.8)                |
| Axial tomography                               | 0.3 (0.7)              | 1.4 (2.3)                | 1 (1.8)                  | 0.7 (1.6)   | <0.001 | 1 (2)                    |
| MNRI                                           | 0.3 (1.3)              | 1 (2.2)                  | 1 (2.6)                  | 0.5 (1.6)   | <0.001 | 0.8 (2.1)                |
| Rehabilitation sessions                        | 0 (0)                  | 0.6 (2.8)                | 0.2 (1.5)                | 0.4 (2.5)   | <0.001 | 0.3 (2)                  |
| Pain clinic sessions                           | 1.4 (1.5)              | 2.2 (1.3)                | 2.2 (1.4)                | 2.1 (1.4)   | <0.001 | 2.1 (1.4)                |
| Other complementary tests                      | 1.3 (1.3)              | 1.9 (1.3)                | 1.8 (1.3)                | 1.8 (1.3)   | 0.003  | 1.8 (1.3)                |
| Specialist visits                              | 2.7 (9.3)              | 7.9 (17.2)               | 7.6 (20.1)               | 4.5 (10.1)  | <0.001 | 6.3 (15.3)               |
| Hospital emergency visits                      | 2.4 (3)                | 2.9 (2.6)                | 2.8 (4.1)                | 3.1 (4.5)   | 0.568  | 3 (4.3)                  |
| Hospital stays (days)                          | 7.7 (16.1)             | 8.4 (16.8)               | 7.4 (15.9)               | 5.4 (13.5)  | <0.001 | 6.6 (15.2)               |
| Surgical interventions <sup>1</sup> , %        | 15.0%                  | 15.3%                    | 15.3%                    | 15.8%       | <0.001 | 15.2%                    |

<sup>1</sup>Includes outpatient minor surgery and surgery with hospitalization > 24 hours (arthroscopy, arthroplasty, etc.). Values expressed as mean (SD: standard deviation) or %. \*p<0.05; †p<0.01; ‡p<0.001 vs. 12 months pre-opioid initiation, not significant when not indicated.

<sup>a</sup>Oxycodone patients included those receiving a combination of oxycodone + naloxone (85.7%) while others (14.3%) were on treatment with oxycodone alone.

Bupren.: buprenorphine; MNRI: Magnetic nuclear resonance imaging.

Figure S1. Sick leaves (graph A) and indirect cost (graph B) in active workers with osteoarthritis and chronic pain by type of strong opioid drug, individually and overall.

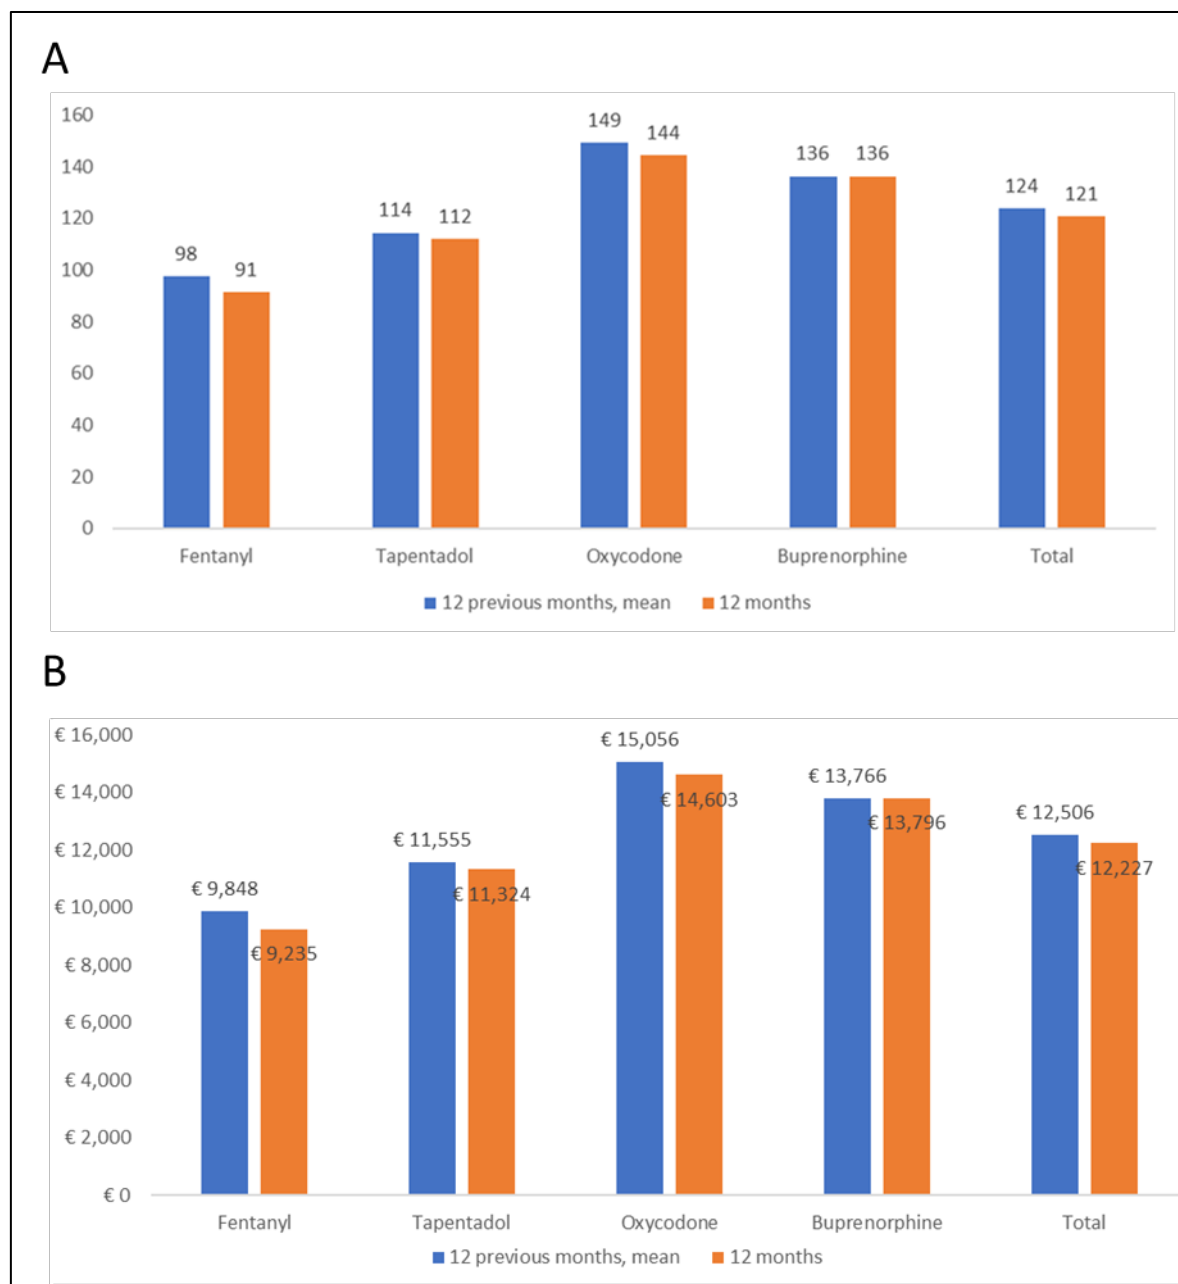

<sup>a</sup>Oxycodone patients included those receiving a combination of oxycodone + naloxone (85.7%) while others (14.3%) were on treatment with oxycodone alone.
